# Supplementary material for: Error-Discovery Learning Boosts Student Engagement and Performance, while Reducing Student Attrition in a Bioinformatics Course
Source: PubMed Central journal article supplement — CBE Life Sci Educ. 2018 Fall;17(3):ar40. doi: 10.1187/cbe.17-04-0061 (PMC6234822; doi:10.1187/cbe.17-04-0061), 2018
Supplement: cbe-17-ar40-s001.pdf [file cbe-17-ar40-s001.pdf]

# Supplemental Material

*CBE—Life Sciences Education*

Lee et al.

Supplementary data for:

## **Error Discovery Learning Boosts Student Engagement and Performance, while Reducing Student Attrition in a Bioinformatics Course**

Christopher J. Lee<sup>1,2\*</sup>, Brit Toven-Lindsey<sup>3</sup>, Casey Shapiro<sup>3</sup>, Michael Soh<sup>3</sup>, Sepideh Mazrouee<sup>2</sup>, Marc Levis-Fitzgerald<sup>3</sup>, and Erin R. Sanders<sup>4,5</sup>

<sup>1</sup> Department of Chemistry and Biochemistry, College of Letters and Science, UCLA

<sup>2</sup> Department of Computer Science, School of Engineering and Applied Sciences, UCLA

<sup>3</sup> Center for Educational Assessment, Office of Instructional Development, UCLA

<sup>4</sup> Center for Education Innovation and Learning in the Sciences, College of Letters and Science, UCLA

<sup>5</sup> Department of Microbiology, Immunology and Molecular Genetics, David Geffen School of Medicine, UCLA

\*Corresponding author

Email: leec@chem.ucla.edu

**Supp. Table 1:** *Departmental cross-listings of this course*

| <b>Enrolled Students</b> | <b>Department</b>        | <b>Course Number</b> | <b>Course Notes</b>                                         |
|--------------------------|--------------------------|----------------------|-------------------------------------------------------------|
| Undergraduate (UG)       | Computer Science         | CS 121               | Became predominant enrollment track for UGs                 |
|                          | Chemistry & Biochemistry | Chem 160A            | Department through which course started                     |
| Graduate (G)             | Computer Science         | CS 221               | Became predominant enrollment track for Gs                  |
|                          | Chemistry & Biochemistry | Chem. 260A           | Department through which course started                     |
|                          | Bioinformatics           | Bioinformatics 260A  | Impacted; students could not drop                           |
|                          | Human Genetics           | Hum. Gen 260A        | No students enrolled via this departmental track after 2004 |

**Supp. Figure 1:** Number of error models needed per target problem, to cover most students' errors

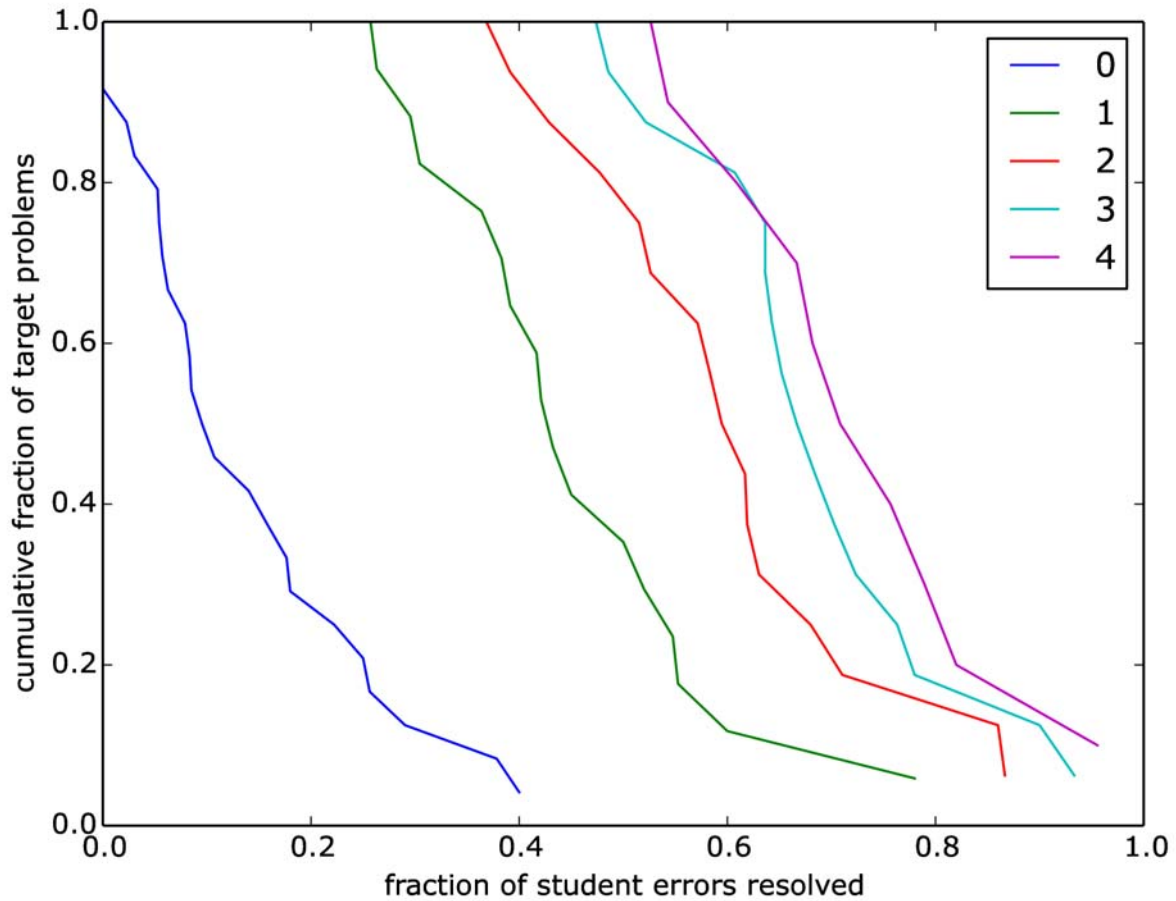

Each curve plots the fraction of target problems (y-axis) for which the top  $M$  error models covered more than  $X\%$  of observed student errors (x-axis), for  $M=0$  (i.e. taking into account only Courselet's list of standard, generic "blindspots"-- e.g. "I didn't read the question correctly" -- and NO error models specific to that target problem);  $M=1$  (the most common error model for that target problem);  $M=2$  (the top two error models for that target problem);  $M=3$ ; and  $M=4$ .
